# Supplementary material
Source: ML conference proceedings conference paper supplement (https://openaccess.thecvf.com/content/CVPR2026/html/Su_PointAlign_Feature-Level_Alignment_CVPR_2026_paper.html)
Supplement: Supplementary file 1 [file Su_PointAlign_Feature-Level_Alignment_CVPR_2026_supplemental.pdf]

## A. Additional Experiments

### A.1. Generalization to Non-Q-Former Architectures

To validate that our alignment regularization is architecture-agnostic and not limited to Q-Former-based models, we apply our method to 3D-LLaVA [5], which uses Omni Superpoint Transformer (OST) with MLP instead of Q-Former, on the Scan2Cap [2] dataset for scene-level 3D dense captioning. As shown in Table 9, our method yields consistent improvements across all four metrics, with CIDEr@0.5 improving by 2.7, demonstrating effectiveness beyond object-level tasks and Q-Former architectures.

Table 9. Scene-level 3D dense captioning on Scan2Cap [2]. Our alignment regularization is applied to 3D-LLaVA [5], which does not use Q-Former. (\* denotes reproduced results.)

| Method    | C@0.5       | B-4@0.5     | M@0.5       | R@0.5       |
|-----------|-------------|-------------|-------------|-------------|
| 3D-LLaVA* | 76.1        | 36.3        | 27.0        | 57.3        |
| + Ours    | <b>78.8</b> | <b>37.1</b> | <b>27.2</b> | <b>57.6</b> |

### A.2. Generalization to Different LLM Backbones

To verify that the middle-layer alignment strategy generalizes across LLM architectures, we conduct layer selection experiments on Phi-3 (32 layers). As shown in Table 10, middle layers (12–20) generally outperform both early and late layers. This aligns with our Phi-2 ablation (Table 5) where Layer 16 achieves optimal results, demonstrating that the strategy is robust across different LLM backbones.

Table 10. Layer selection ablation on Phi-3 backbone. Middle layers generally achieve better performance, aligning with the Phi-2 results in Table 5.

| Layer      | ModelNet40   |              | Objaverse    |              | Average      |
|------------|--------------|--------------|--------------|--------------|--------------|
|            | (I)          | (C)          | (I)          | (C)          |              |
| MiniGPT-3D | 62.50        | <b>56.50</b> | 57.13        | 48.03        | 56.04        |
| 8          | 65.00        | <b>56.50</b> | 57.18        | <b>49.59</b> | 57.07        |
| 12         | <b>66.00</b> | 56.00        | <b>58.74</b> | 49.35        | <b>57.52</b> |
| 16         | 65.50        | 56.00        | 58.69        | 48.66        | 57.21        |
| 20         | <b>66.00</b> | 56.00        | 58.51        | 49.27        | 57.45        |
| 24         | 65.00        | 55.00        | 57.82        | 49.31        | 56.78        |
| 28         | 63.50        | 54.00        | 58.10        | 48.95        | 56.14        |
